# Supplementary material
Source: Research Square preprint supplement (doi:10.21203/rs.3.rs-9116080/v1)
Supplement: Supplementary file 1 [file 1c9ca834dd2573c267c67dae.xlsx]

## Sheet: Restriction_Note
Restricted-data note
Status	This workbook is part of an anonymized referee package prepared for a restricted-data submission.
What is not included	Raw vendor files and derived firm-level analysis data are not included because the study relies on licensed commercial databases, including Refinitiv Datastream/Worldscope, together with complementary ownership sources.
What is included	Variable definitions, indicative source fields, expected reconstructed file structures, sample counts, and a table-by-table verification crosswalk.
How to use	Licensed users can reconstruct ANALYSIS_PANEL.csv, ISSUE_HISTORY.csv, and OWNERSHIP_CODING.csv from the documented fields and then execute the Stata script.
Declaration	Use the restricted-data Data Availability statement in both the manuscript and the submission-system Declarations field.

## Sheet: Sample_Construction
Sample construction and annual counts
Counts reported in the manuscript; provided here as an anonymized referee-facing reconstruction guide.
Step	Obs.
Annual Top-250 universe (year-by-year constituents)	6250
Exclude financials (SIC 6000-6999) and utilities (SIC 4900-4999)	5420
Drop missing (assets, debt, market equity, sales)	5170
Winsorize continuous vars (1%/99%); drop extreme outliers	5012
Final unbalanced panel (firm-years)	5012
Unique firms	247
Year	Total	Family	Non-family	Family share (%)
2000	250	72	178	28.80000
2001	250	73	177	29.20000
2002	250	70	180	28.00000
2003	250	71	179	28.40000
2004	250	72	178	28.80000
2005	250	74	176	29.60000
2006	250	75	175	30.00000
2007	250	76	174	30.40000
2008	250	74	176	29.60000
2009	250	73	177	29.20000
2010	250	72	178	28.80000
2011	250	70	180	28.00000
2012	250	71	179	28.40000
2013	250	72	178	28.80000
2014	250	73	177	29.20000
2015	250	74	176	29.60000
2016	250	75	175	30.00000
2017	250	76	174	30.40000
2018	250	77	173	30.80000
2019	250	77	173	30.80000
2020	250	78	172	31.20000
2021	250	78	172	31.20000
2022	250	77	173	30.80000
2023	250	76	174	30.40000
2024	250	75	175	30.00000

## Sheet: Variable_Dictionary
Variable dictionary and provenance
Definitions are from manuscript table 3. Source/provenance and raw-field guidance were added for the referee package.
Section	Variable	Definition / construction	Expected provenance	Indicative raw fields	Key transformation
Panel A: Dependent variables	BookLev	Total debt / Total assets.	Licensed accounting/market data (e.g., Worldscope/Datastream)	total_debt, total_assets	debt/assets
Panel A: Dependent variables	MktLev	Total debt / (Total debt + Market equity).	Licensed accounting/market data (e.g., Worldscope/Datastream)	total_debt, market_equity	debt/(debt+market equity)
Panel A: Dependent variables	LTLev	Long-term debt / Total assets.	Licensed accounting/market data (e.g., Worldscope/Datastream)	long_term_debt, total_assets	long-term debt/assets
Panel A: Dependent variables	NetLev	(Total debt − Cash) / EBITDA (winsorized).	Licensed accounting/market data (e.g., Worldscope/Datastream)	total_debt, cash, ebitda	(debt-cash)/EBITDA; winsorized
Panel B: Family involvement	FamilyFirm	1 if family voting rights ≥ 25% (baseline).	Complementary ownership and governance coding	family_votes_pct	1 if family voting rights >=25% (baseline)
Panel B: Family involvement	FamVotes	Family voting rights (%) where available.	Complementary ownership and governance coding	family_votes_pct	percentage points
Panel B: Family involvement	FamilyCEO	1 if CEO is a family member.	Complementary ownership and governance coding	family_ceo	binary indicator
Panel B: Family involvement	FamilyChair	1 if chair/president is a family member.	Complementary ownership and governance coding	family_chair	binary indicator
Panel B: Family involvement	FamBoardShare	Family directors / board size.	Complementary ownership and governance coding	family_directors, board_size	family directors / board size
Panel B: Family involvement	Succession	1 in succession window (t−1..t+1 around CEO turnover).	Complementary ownership and governance coding	ceo_turnover_date or succession flag	1 in t-1..t+1 around family succession window
Panel C: Pecking order & market timing	DEF	Financing deficit (standardized): (Capex + ΔWC + Dividends + Repurchases − CFO) / Assets.	Licensed accounting/market data (e.g., Worldscope/Datastream)	capex, delta_wc, dividends, repurchases, cfo, assets	(Capex + ΔWC + Dividends + Repurchases − CFO) / Assets; standardized for regressions
Panel C: Pecking order & market timing	EFWAMB	External-financing-weighted average market-to-book (historical market timing).	Derived from issue history plus market-to-book	issue history, issue amount, issue-date market-to-book	external-finance-weighted average market-to-book
Panel C: Pecking order & market timing	MtoB	Market-to-book ratio (growth opportunities).	Licensed accounting/market data (e.g., Worldscope/Datastream)	market_equity, book_equity/total assets proxy	ratio
Panel C: Pecking order & market timing	RunUp	Past 12-month stock return (t−12..t−1).	Licensed accounting/market data (e.g., Worldscope/Datastream)	return history	past 12-month stock return
Panel D: Full controls (ALL) used in baseline specifications	Size	ln(Assets).	Licensed accounting/market data (e.g., Worldscope/Datastream)	total_assets	ln(assets)
Panel D: Full controls (ALL) used in baseline specifications	Profit	ROA or EBITDA/Assets.	Licensed accounting/market data (e.g., Worldscope/Datastream)	roa or ebitda, total_assets	ROA or EBITDA/assets
Panel D: Full controls (ALL) used in baseline specifications	Tangibility	PPE/Assets.	Licensed accounting/market data (e.g., Worldscope/Datastream)	ppe, total_assets	PPE/assets
Panel D: Full controls (ALL) used in baseline specifications	Liquidity	Cash/Assets.	Licensed accounting/market data (e.g., Worldscope/Datastream)	cash, total_assets	cash/assets
Panel D: Full controls (ALL) used in baseline specifications	NDTS	Depreciation/Assets.	Licensed accounting/market data (e.g., Worldscope/Datastream)	depreciation, total_assets	depreciation/assets
Panel D: Full controls (ALL) used in baseline specifications	TaxRate	Cash taxes / Pretax income (bounded).	Licensed accounting/market data (e.g., Worldscope/Datastream)	cash_taxes, pretax_income	bounded cash tax rate
Panel D: Full controls (ALL) used in baseline specifications	Capex	Capital expenditures/Assets.	Licensed accounting/market data (e.g., Worldscope/Datastream)	capex, total_assets	capex/assets
Panel D: Full controls (ALL) used in baseline specifications	RnD	R&D/Assets (plus missing indicator where needed).	Licensed accounting/market data (e.g., Worldscope/Datastream)	rnd, total_assets	R&D/assets; missing indicator if needed
Panel D: Full controls (ALL) used in baseline specifications	Intang	Intangibles/Assets.	Licensed accounting/market data (e.g., Worldscope/Datastream)	intangibles, total_assets	intangibles/assets
Panel D: Full controls (ALL) used in baseline specifications	WC	Net working capital/Assets.	Licensed accounting/market data (e.g., Worldscope/Datastream)	net_working_capital, total_assets	NWC/assets
Panel D: Full controls (ALL) used in baseline specifications	SalesGrow	ΔSales / Sales_{t−1}.	Licensed accounting/market data (e.g., Worldscope/Datastream)	sales, lagged sales	Δsales/sales_(t−1)
Panel D: Full controls (ALL) used in baseline specifications	Volatility	Rolling σ(ROA) or σ(SalesGrow).	Licensed accounting/market data (e.g., Worldscope/Datastream)	roa or sales growth history	rolling standard deviation
Panel D: Full controls (ALL) used in baseline specifications	Zscore	Financial health index (Altman-type proxy).	Licensed accounting/market data (e.g., Worldscope/Datastream)	accounting components for Altman-type proxy	researcher-constructed proxy
Panel D: Full controls (ALL) used in baseline specifications	InterestCov	EBIT / Interest expense (winsorized).	Licensed accounting/market data (e.g., Worldscope/Datastream)	ebit, interest_expense	EBIT/interest expense; winsorized
Panel D: Full controls (ALL) used in baseline specifications	Dividend	1 if dividend paid.	Licensed accounting/market data (e.g., Worldscope/Datastream)	dividends	1 if dividend paid
Panel D: Full controls (ALL) used in baseline specifications	Age	ln(1 + years since listing/IPO).	Licensed accounting/market data (e.g., Worldscope/Datastream)	listing year / IPO year	ln(1+years since listing)
Panel D: Full controls (ALL) used in baseline specifications	Analyst	ln(1 + analyst coverage), if available.	Derived / see manuscript	analyst_coverage	ln(1+coverage)
Panel D: Full controls (ALL) used in baseline specifications	Spread	Bid-ask spread (or Amihud illiquidity), if available.	Derived / see manuscript	bid_ask_spread or Amihud illiquidity	liquidity proxy
Panel D: Full controls (ALL) used in baseline specifications	Turnover	Share turnover/liquidity proxy.	Derived / see manuscript	share turnover	liquidity proxy
Panel D: Full controls (ALL) used in baseline specifications	IndLev	Industry-year median leverage.	Derived from panel / industry classifications	industry_code, year, leverage	industry-year median leverage
Panel D: Full controls (ALL) used in baseline specifications	HHI	Industry concentration, if available.	Derived from panel / industry classifications	industry concentration inputs	industry concentration
Panel D: Full controls (ALL) used in baseline specifications	GDPg	France GDP growth (annual).	Public macro/market series and researcher-coded period indicators	France GDP growth	annual macro series
Panel D: Full controls (ALL) used in baseline specifications	Inflation	France CPI inflation (annual).	Public macro/market series and researcher-coded period indicators	France CPI inflation	annual macro series
Panel D: Full controls (ALL) used in baseline specifications	OAT10y	France 10-year sovereign yield.	Public macro/market series and researcher-coded period indicators	France 10-year sovereign yield	annual macro series
Panel D: Full controls (ALL) used in baseline specifications	CreditSpr	Credit spread proxy (Europe/France).	Public macro/market series and researcher-coded period indicators	credit spread proxy	annual macro/market series
Panel D: Full controls (ALL) used in baseline specifications	COVID	1 for 2020-2021 (baseline); robustness uses COVID=2020 only.	Public macro/market series and researcher-coded period indicators	fiscal_year	1 for 2020-2021 baseline; robustness 2020 only

## Sheet: Table_Crosswalk
Regression crosswalk for manuscript tables 7-20
Use this sheet with the Stata do-file and the target-table CSV to verify the reported results. The corresponding data files are not included in this restricted-data archive.
Table code	Table title	Outcome	Estimator / Stata command	Core regressors	Main target to verify	Expected data file(s)	Reviewer note
T07	Baseline FE (BookLev) with full controls	BookLev	Firm FE / reghdfe	FamilyFirm + full controls	FamilyFirm ≈ -0.0142	ANALYSIS_PANEL.csv	Baseline conservative leverage test
T08	Dynamic trade-off / speed of adjustment	BookLev	System GMM / xtabond2	L.BookLev, FamilyFirm, controls	L.BookLev < 1; GMM diagnostics reported	ANALYSIS_PANEL.csv	Two-step system GMM with Windmeijer-corrected SE
T09	Family moderation of leverage persistence	BookLev	System GMM / xtabond2	FamilyFirm × L.BookLev	Interaction ≈ +0.0284	ANALYSIS_PANEL.csv	Implied SOA lower in family firms
T10	Pecking-order baseline	ΔDebt/Assets	Firm FE / reghdfe	DEF + full controls	DEF > 0	ANALYSIS_PANEL.csv	Net debt issuance scaled by assets
T11	Pecking-order moderation by family control	ΔDebt/Assets	Firm FE / reghdfe	DEF × FamilyFirm	Interaction ≈ +0.1146	ANALYSIS_PANEL.csv	Family firms finance more of deficits with debt
T12	Market-timing imprint	MktLev	Firm FE / reghdfe	EFWAMB + full controls	EFWAMB < 0	ANALYSIS_PANEL.csv + ISSUE_HISTORY.csv	Historical market-timing imprint on leverage
T13	Market-timing moderation by family control	MktLev	Firm FE / reghdfe	EFWAMB × FamilyFirm	Interaction ≈ +0.0169	ANALYSIS_PANEL.csv + ISSUE_HISTORY.csv + OWNERSHIP_CODING.csv	Timing imprint weaker in family firms
T14	Unified specification	BookLev	Firm FE / reghdfe	DEF × FamilyFirm; EFWAMB × FamilyFirm	FamilyFirm remains negative	ANALYSIS_PANEL.csv + ISSUE_HISTORY.csv + OWNERSHIP_CODING.csv	Joint trade-off / pecking-order / timing test
T15	COVID shock and family moderation	BookLev	Firm FE / reghdfe	FamilyFirm × COVID	Interaction ≈ -0.0091	ANALYSIS_PANEL.csv + OWNERSHIP_CODING.csv	TWFE version identifies interaction
T16	Event study around COVID	BookLev	Firm FE event study / reghdfe	FamilyFirm × event-year dummies	No strong pre-trends; negative 2020-2022	ANALYSIS_PANEL.csv + OWNERSHIP_CODING.csv	2019 reference year
T17	Alternative family definitions	BookLev	Firm FE / reghdfe	FamilyFirm20 / 25 / 30	Family effect remains negative	ANALYSIS_PANEL.csv + OWNERSHIP_CODING.csv	Robustness to voting-right thresholds
T18	Alternative outcomes and inference	BookLev / LTLev / NetLev	FE / reghdfe + xtscc	FamilyFirm	Negative family coefficient persists	ANALYSIS_PANEL.csv	Alternative leverage measures and SE estimators
T19	Endogeneity safeguards	BookLev / ΔDebt/Assets / MktLev	PSM + entropy balancing	FamilyFirm ATT / FE coefficient	Negative ATT for BookLev; positive ATT for debt financing	ANALYSIS_PANEL.csv + OWNERSHIP_CODING.csv	Observable-balance checks
T20	Quantile regressions	BookLev	Quantile regression + bootstrap	FamilyFirm	Family effect more negative in upper tail	ANALYSIS_PANEL.csv	q25, q50, q75

## Sheet: Expected_Panel_Columns
Expected columns in ANALYSIS_PANEL.csv
These are the field names expected by the Stata script for licensed users reconstructing ANALYSIS_PANEL.csv.
Order	Column name	Status
1	firm_id	Required by code
2	firm_name	Used when available
3	ticker	Used when available
4	isin	Used when available
5	fiscal_year	Required by code
6	sic_code	Used when available
7	industry_code	Used when available
8	total_assets	Used when available
9	total_debt	Used when available
10	long_term_debt	Used when available
11	cash	Used when available
12	ebitda	Used when available
13	ppe	Used when available
14	depreciation	Used when available
15	capex	Used when available
16	cfo	Used when available
17	dividends	Used when available
18	repurchases	Used when available
19	net_working_capital	Used when available
20	sales	Used when available
21	sales_lag	Used when available
22	roa	Used when available
23	ebit	Used when available
24	interest_expense	Used when available
25	cash_taxes	Used when available
26	pretax_income	Used when available
27	rnd	Used when available
28	intangibles	Used when available
29	years_since_listing	Used when available
30	market_equity	Used when available
31	analyst_coverage	Used when available
32	bid_ask_spread	Used when available
33	turnover	Used when available
34	mtob_input	Used when available
35	runup_12m	Used when available
36	volatility_input	Used when available
37	zscore_input	Used when available
38	indlev_input	Used when available
39	hhi_input	Used when available
40	gdpg	Used when available
41	inflation	Used when available
42	oat10y	Used when available
43	creditspr	Used when available
44	family_votes_pct	Used when available
45	family_ceo	Used when available
46	family_chair	Used when available
47	family_directors	Used when available
48	board_size	Used when available
49	succession	Used when available
50	family_board_share	Used when available
51	familyfirm	Required by code
52	booklev	Required by code
53	mktlev	Used when available
54	ltlev	Used when available
55	netlev	Used when available
56	size	Used when available
57	profit	Used when available
58	tangibility	Used when available
59	liquidity	Used when available
60	ndts	Used when available
61	taxrate	Used when available
62	age	Used when available
63	wc_change	Used when available
64	def_raw	Used when available
65	def_std	Used when available
66	covid	Used when available
67	efwamb	Used when available

## Sheet: Expected_Issue_Columns
Expected columns in ISSUE_HISTORY.csv
These fields document the expected structure of ISSUE_HISTORY.csv for licensed users; no issue-history data are included in this archive.
Order	Column name	Description
1	firm_id	Issue-history field
2	issue_year	Issue-history field
3	ext_fin_amount	Issue-history field
4	mtob_issue	Issue-history field
5	issue_type	Issue-history field
6	weighted_mtob	Issue-history field

## Sheet: Expected_Ownership_Cols
Expected columns in OWNERSHIP_CODING.csv
These fields document the expected structure of OWNERSHIP_CODING.csv for licensed users; no ownership-coding data are included in this archive.
Order	Column name	Description
1	firm_id	Ownership-coding field
2	firm_name	Ownership-coding field
3	ticker	Ownership-coding field
4	isin	Ownership-coding field
5	fiscal_year	Ownership-coding field
6	family_votes_pct	Ownership-coding field
7	familyfirm25	Ownership-coding field
8	familyfirm20	Ownership-coding field
9	familyfirm30	Ownership-coding field
10	familyfirm50	Ownership-coding field
11	family_ceo	Ownership-coding field
12	family_chair	Ownership-coding field
13	family_directors	Ownership-coding field
14	board_size	Ownership-coding field
15	family_board_share	Ownership-coding field
16	source_primary	Ownership-coding field
17	source_secondary	Ownership-coding field
18	supporting_document	Ownership-coding field
19	coding_note	Ownership-coding field
20	reviewer_note	Ownership-coding field

## Sheet: Upload_Checklist
Pre-upload checklist
This sheet is for the submitting author; do not include author names or repository-owner links in referee-facing files.
Item	Action
1	Confirm that no raw or derived firm-level data from licensed sources are included in this archive.
2	Confirm that Word, Excel, ZIP, and Stata files contain no author names, affiliations, ORCID IDs, acknowledgements, grant identifiers, comments, or tracked changes.
3	Remove local file paths, institutional folders, and username strings from all scripts and logs.
4	Use the restricted-data Data Availability statement in both the manuscript and the submission system Declarations section.
5	Provide any full repository links only in the cover letter if the journal asks for redacted links in referee files.
