# Supplementary material
Source: Research Square preprint supplement (doi:10.21203/rs.3.rs-9116080/v1)
Supplement: Supplementary file 2 [file 685a43f8b12225db940010cc.docx]

Sample, Data, and Coding Protocol

Anonymized note for editors and referees

# 1. Study scope

The study uses an unbalanced panel of French listed non-financial firms over 2000–2024. The annual starting universe is the top-250 listed firms by year. The manuscript reports a final panel of 5,012 firm-year observations and 247 unique firms.

# 2. Data provenance and restriction

The accounting and market inputs come from licensed commercial databases, including Refinitiv Datastream/Worldscope, together with complementary ownership and governance sources used to code family control. Because these source-provider files are licensed, neither raw vendor files nor the derived firm-level panel are included in this archive.

# 3. Sample construction

Start from the year-by-year top-250 listed-firm universe. Exclude financial firms (SIC 6000–6999) and utilities (SIC 4900–4999). Require non-missing items needed to construct leverage and the core controls. Winsorize continuous variables at the 1st and 99th percentiles and remove extreme outliers as described in the manuscript.

# 4. Family-control coding

The baseline family-firm indicator equals one when family voting rights are at least 25 percent. Robustness variants at 20, 30, and 50 percent should also be retained. Complementary indicators include family CEO, family chair/president, family directors, board size, family board share, and succession-window markers. The audit trail should preserve the firm-year source trail and a short coding note.

# 5. Key constructed variables

BookLev = total debt / total assets. MktLev = total debt / (total debt + market equity). LTLev = long-term debt / total assets. NetLev = (total debt − cash) / EBITDA, winsorized. DEF = (Capex + ΔWorking capital + Dividends + Repurchases − CFO) / Assets, standardized. EFWAMB = external-finance-weighted average market-to-book, documented through issue-history support.

# 6. Reconstruction logic for licensed users

The workbook 'Documentation_and_Crosswalk.xlsx' lists the expected columns for ANALYSIS_PANEL.csv, ISSUE_HISTORY.csv, and OWNERSHIP_CODING.csv. Licensed users can use those field lists together with the Stata code to rebuild the analysis files and reproduce the estimations.

# 7. Replication workflow

Reviewers can inspect the workflow directly from the documentation and code contained in this archive. Licensed users who reconstruct the expected CSV files can place them beside the do-file, run the script, and compare the generated outputs with Target_Tables_7_20.csv and the crosswalk workbook.

**Archive status.** This note is prepared for the restricted-data scenario: documentation and code are deposited, while licensed firm-level data remain unavailable for upload.
