# Supplementary material
Source: Research Square preprint supplement (doi:10.21203/rs.3.rs-9116080/v1)
Supplement: Supplementary file 3 [file df0e1f774fd8a24eb256b590.docx]

Anonymized Referee Package

Licensed-data restricted version for double-blind peer review

**Purpose.** This archive contains the documentation, coding protocol, field-level variable map, Stata estimation script, and manuscript-result crosswalk required to scrutinize the empirical workflow while preserving double-blind review.

**Important note.** This archive intentionally excludes raw vendor files and derived firm-level analysis data because the study relies on licensed commercial databases, including Refinitiv Datastream/Worldscope, together with complementary ownership sources. Those data cannot be redistributed through referee-facing supplementary files under the applicable license terms.

# Archive contents

- Documentation_and_Crosswalk.xlsx — variable dictionary, expected reconstructed field structure, sample counts, and table-by-table verification crosswalk.
- Sample_and_Coding_Protocol.docx — sample screens, family-control coding logic, and reconstruction workflow.
- replication_tables_7_20.do — estimation script for manuscript tables 7–20, written for licensed users who reconstruct the documented data files.
- CODE_README.txt — execution note for the restricted-data scenario.
- Target_Tables_7_20.csv — numerical verification targets transcribed from the manuscript tables.

# How editors and referees should read this package

1. Use the workbook and protocol note to inspect the sample construction, variable definitions, family-control coding rules, and expected reconstructed data structure.
2. Use the Stata script and target-table file to assess whether the estimation workflow corresponds to the reported tables.
3. If a reviewer has licensed access to the same source databases, the documented field list and scripts can be used to reconstruct the analysis files and rerun the estimations.

# Double-blind safeguards

- No author names, affiliations, ORCID identifiers, acknowledgements, grant identifiers, repository-owner names, or institution-specific local paths are intentionally included in this archive.
- Any full repository link, if later required by the journal, should be supplied only in the cover letter and not in referee-facing supplementary material.

**Recommended editorial use.** This archive is designed for the restricted-data scenario. The corresponding Data Availability statement should explain that the source-provider files and derived firm-level panel are not shareable because of licensing constraints, while the reconstruction protocol and code are fully documented.
